# Supplementary material
Source: publisher figshare collection journal article supplement (https://acs.figshare.com/ndownloader/files/22011951)
Supplement: Supplementary file 1 [file 22011951]

Supporting Information for

**Unravelling Work Function Contributions and Their Engineering in**

**2 2H-MoS<sub>2</sub> Single Crystal Discovered by Molecular Probe**

**Interaction**

*Amir Ghiami,<sup>†, #, Δ</sup> Melanie Timpel,<sup>‡, Δ, \*</sup> Marco V. Nardi,<sup>#, ‡, \*</sup> Andrea Chiappini,<sup>\$</sup> Petr Nozar,<sup>#</sup>  
Alberto Quaranta,<sup>‡</sup> and Roberto Verucchi<sup>#</sup>*

<sup>†</sup>Department of Chemistry, Life Science and Environmental Sustainability - University of Parma,  
Parco Area delle Scienze 17/A, 43124 Parma, Italy

<sup>#</sup>IMEM-CNR, Institute of Materials for Electronic and Magnetism, Trento unit c/o Fondazione  
Bruno Kessler, Via alla Cascata 56/C, Povo, 38123 Trento, Italy

<sup>‡</sup>Department of Industrial Engineering, University of Trento, Via Sommarive 9, 38123 Trento,  
Italy

<sup>\$</sup>CNR-IFN, CSMFO Lab, Via Alla Cascata 56/C, 38123 Trento, Italy

**Corresponding Authors**

\*Email: melanie.timpel@unitn.it; marcovittorio.nardi@unitn.it.

Figure S1 shows the C 1s, O 1s and N 1s core levels of as-received MoS<sub>2</sub> single crystal and after solvent-cleaning and blowing dry with nitrogen, proving that in both cases neither carbon, oxygen nor nitrogen were present on the pristine MoS<sub>2</sub> sample.

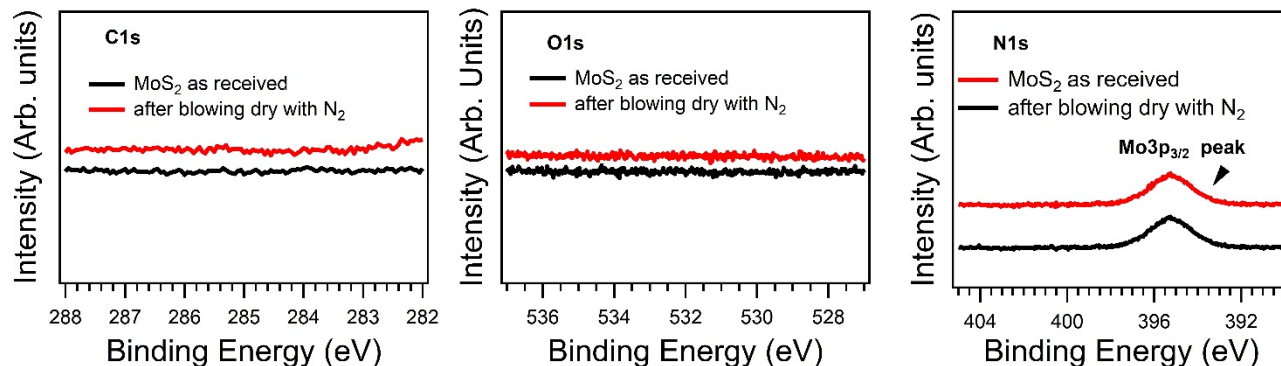

**Figure S1.** C 1s, O 1s and N 1s core levels of as-received MoS<sub>2</sub> single crystal and after solvent-cleaning and nitrogen blowing.

Figure S2 displays the C 1s and O 1s core levels of thiol-functionalized (thermally treated) MoS<sub>2</sub> sample, exhibiting components with the correct relative weight (i.e., intact molecule).

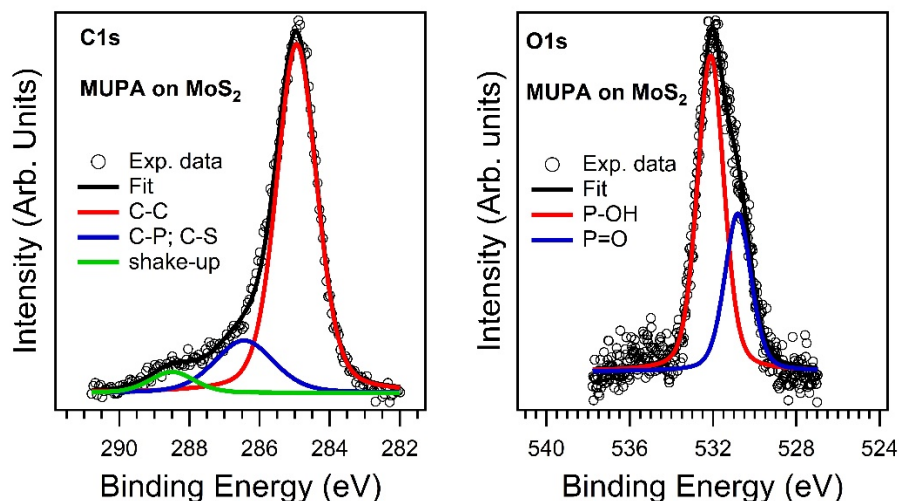

**Figure S2.** C 1s and O 1s core levels of thiol-functionalized (thermally treated) MoS<sub>2</sub> single crystal.
